# Supplementary material for: Splicing junction-based classifier for the detection of abnormal constitutive activation of the KEAP1-NRF2 system
Source: PubMed Central journal article supplement (PMC11624210; doi:10.1038/s41540-024-00475-w), 2024-12-06
Supplement: 41540_2024_475_MOESM2_ESM.pdf [file 41540_2024_475_MOESM2_ESM.pdf]

# Supplementary Figures:

TCGA-78-7150-01A: *KEAP1* Region

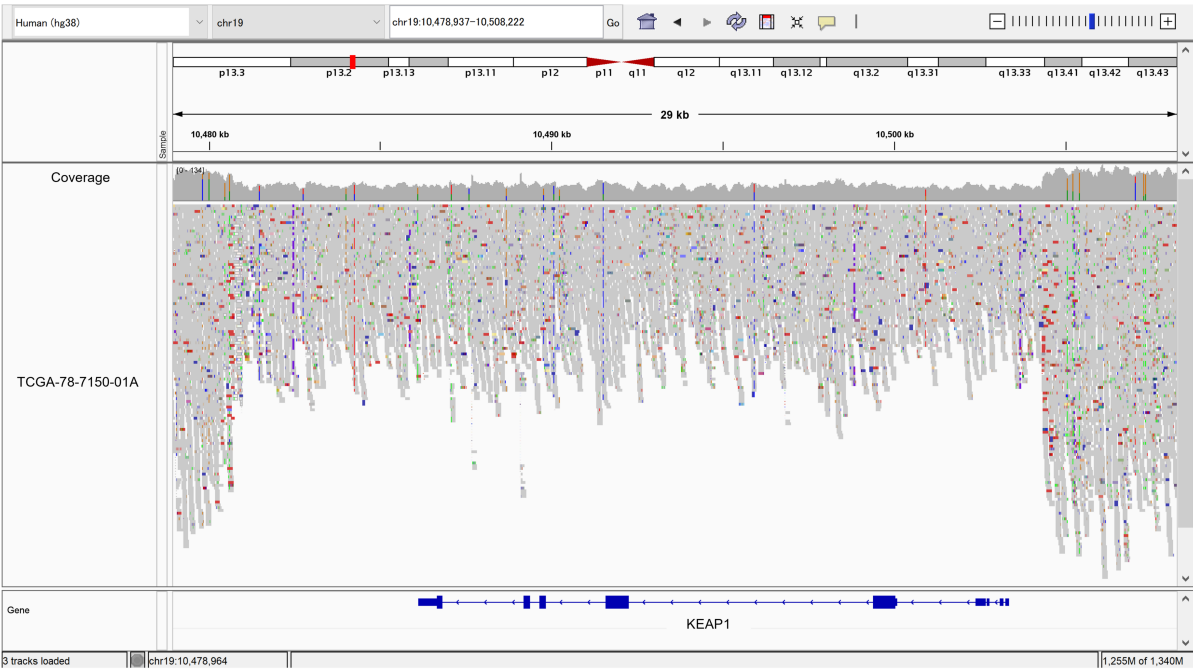

**Supplementary Fig. 1.** IGV visualization of the deletion of *KEAP1* in TCGA-78-7150-01A.

# TCGA-DD-AACZ-01A: *KEAP1* Region

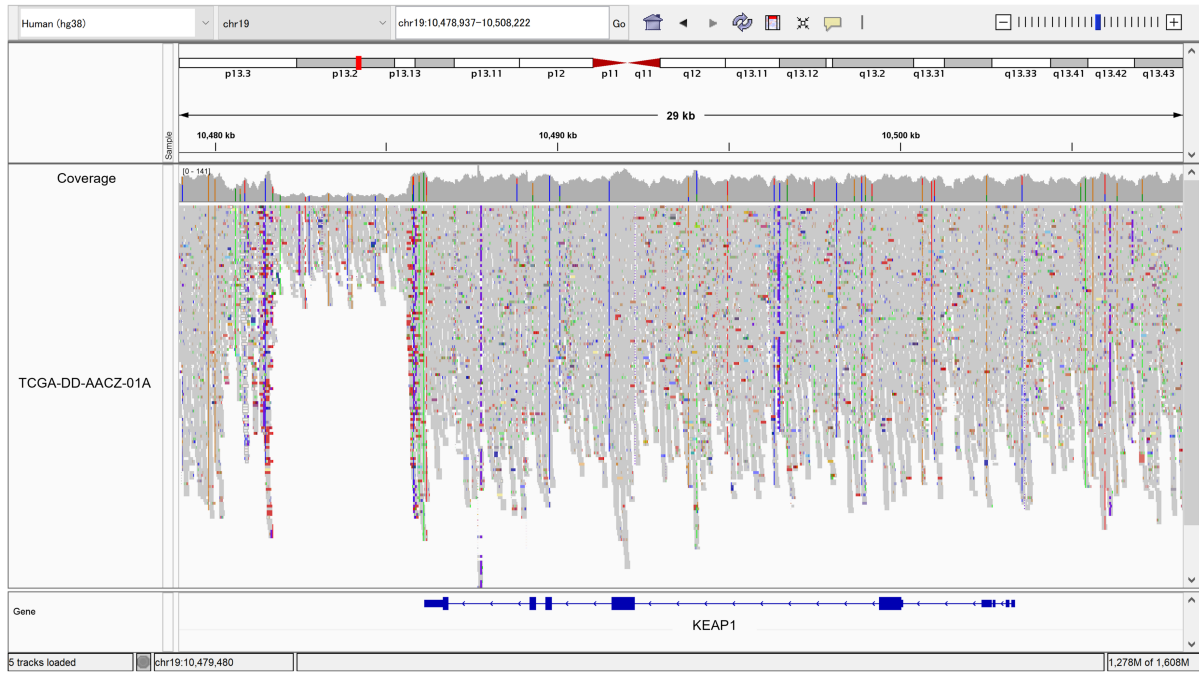

**Supplementary Fig. 2.** IGV visualization of the deletion downstream of *KEAP1* in TCGA-DD-AACZ-01A.

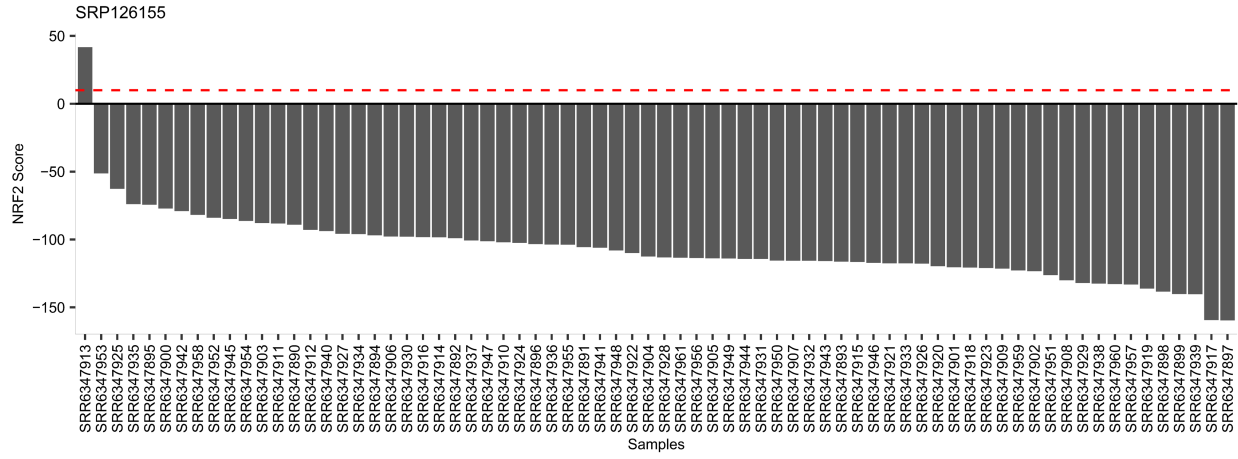

**Supplementary Fig. 3.** Results of our classifier on project SRP126155.

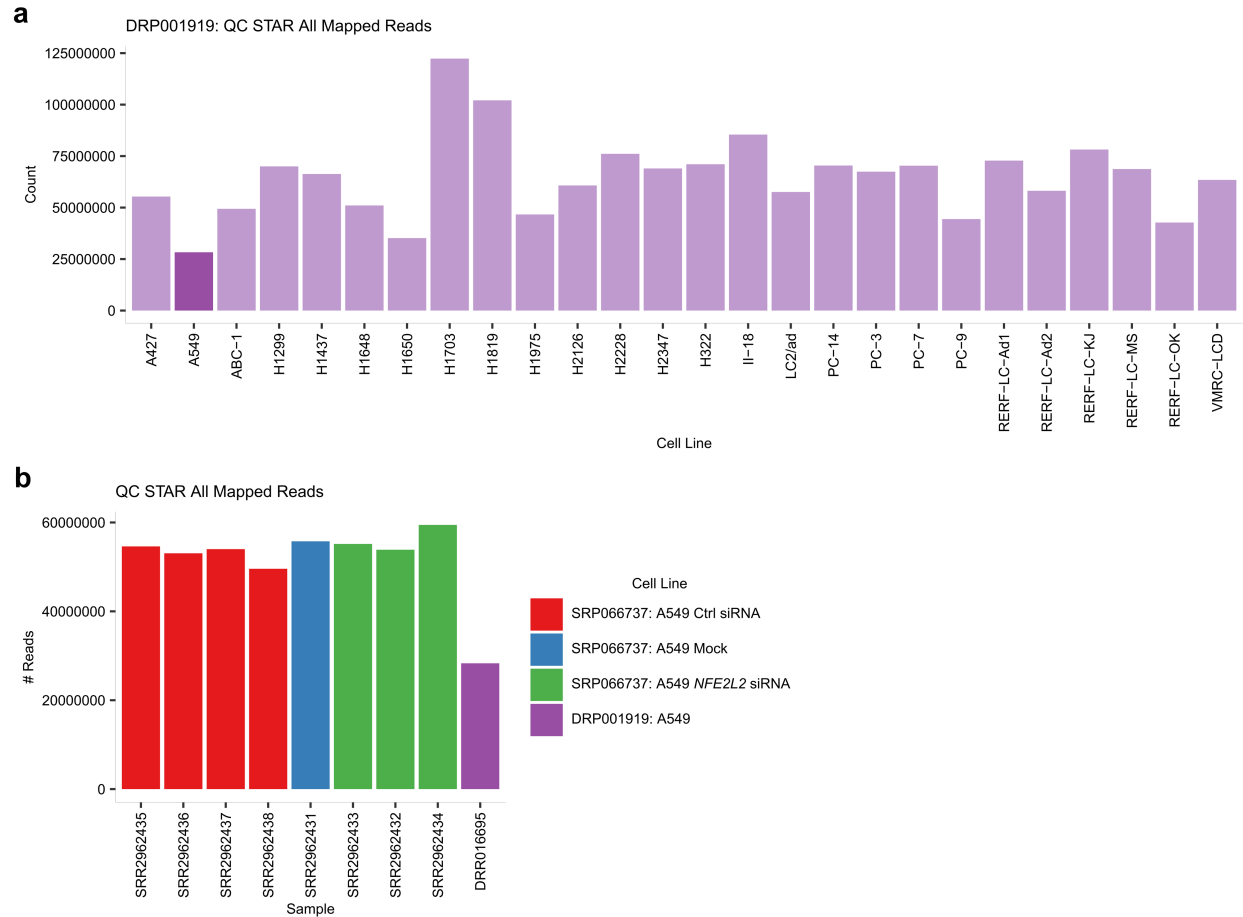

**Supplementary Fig. 4. Quality assessment of A549 in DRP001919:** a) DRP001919 project quality control metrics: A detailed review of recount3's quality control metrics for project DRP001919 indicates that the A549 cell line reports the lowest totals in both mapped reads and splice events. This reduced sequencing data quality likely contributed to the low NRF2 score observed for this cell line. b) SRP066737 project quality control metrics against the A549 cell line of DRP001919: A549 run from DRP001919 has also a comparably low quality when compared to an A549-focused project such as SRP066737.

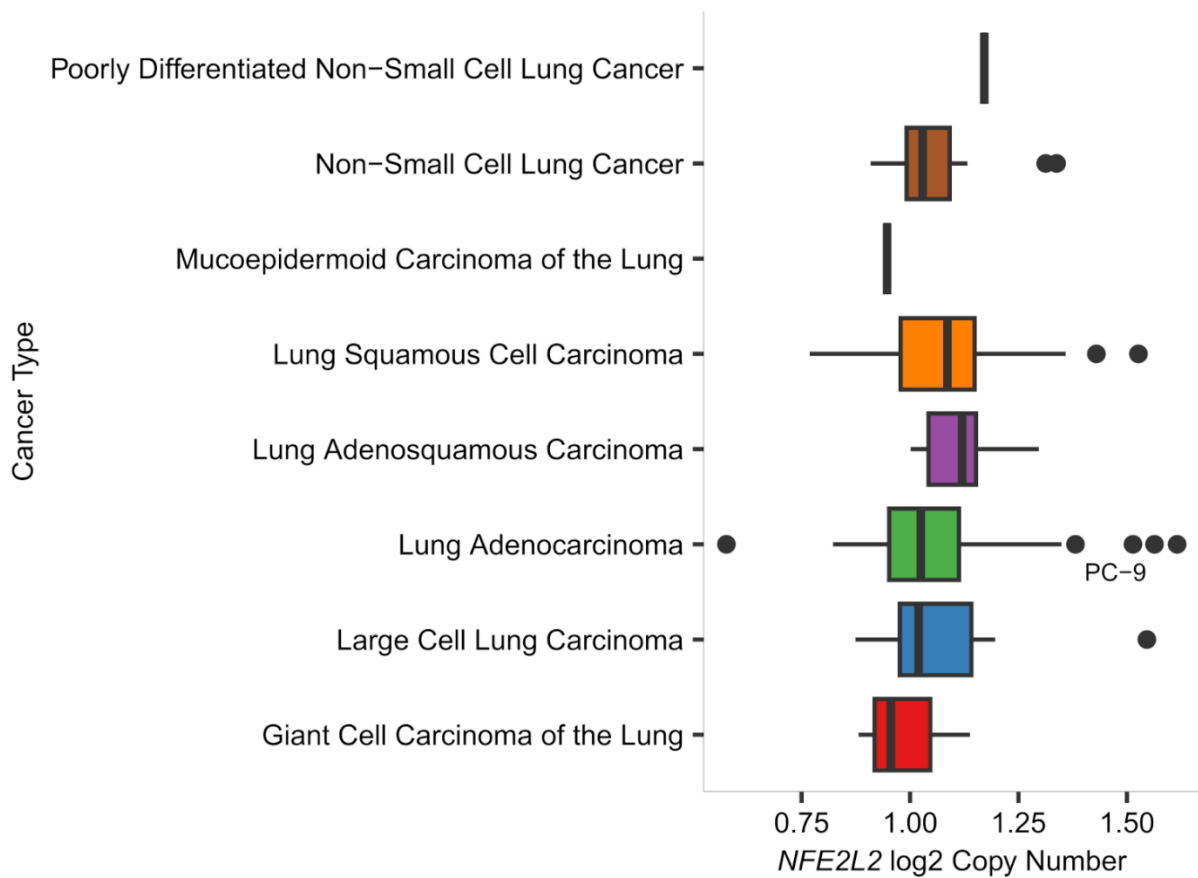

**Supplementary Fig. 5.** DepMap's copy number data for *NFE2L2* in lung cancer cell lines indicates an amplification in the PC-9 line, consistent with our classifier's high scoring results for this cell.

**Supplementary Table 1:** Report of the 15 samples with signs of potential copy number alterations in *KEAP1* and *NFE2L2* regions and with available whole genome sequencing.

| TCGA_ID          | Cancer | Score       | Gene  | Chromosome | Start     | End       | Num_Probes | Segment_Mean |
|------------------|--------|-------------|-------|------------|-----------|-----------|------------|--------------|
| TCGA-LN-A49U-01A | ESCA   | 236.6481766 | KEAP1 | 19         | 283868    | 27749470  | 9059       | -0.1086      |
| TCGA-LN-A49U-01A | ESCA   | 236.6481766 | NRF2  | 2          | 177134176 | 177269788 | 63         | 0.5283       |
| TCGA-LN-A49U-01A | ESCA   | 236.6481766 | NRF2  | 2          | 177271349 | 177286621 | 13         | 0.0687       |
| TCGA-S8-A6BW-01A | ESCA   | 180.7643684 | KEAP1 | 19         | 283868    | 18634853  | 7246       | 0.06         |
| TCGA-S8-A6BW-01A | ESCA   | 180.7643684 | NRF2  | 2          | 153924165 | 180396890 | 15879      | 0.541        |
| TCGA-CV-7103-01A | HNSC   | 18.84691906 | KEAP1 | 19         | 283868    | 22734049  | 8419       | 0.032        |
| TCGA-CV-7103-01A | HNSC   | 18.84691906 | NRF2  | 2          | 165404965 | 177290111 | 7555       | 0.5184       |
| TCGA-BA-A6D8-01A | HNSC   | 52.62666387 | KEAP1 | 19         | 283868    | 58370362  | 24162      | 0.1048       |
| TCGA-BA-A6D8-01A | HNSC   | 52.62666387 | NRF2  | 2          | 177116115 | 177364624 | 139        | 0.5817       |
| TCGA-CV-6941-01A | HNSC   | 25.04864034 | KEAP1 | 19         | 283868    | 27749470  | 9060       | -0.036       |
| TCGA-CV-6941-01A | HNSC   | 25.04864034 | NRF2  | 2          | 177103108 | 177441564 | 189        | 0.5007       |
| TCGA-CC-A5UD-01A | LIHC   | 34.36909766 | KEAP1 | 19         | 283868    | 17488577  | 6684       | -0.9396      |
| TCGA-CC-A5UD-01A | LIHC   | 34.36909766 | NRF2  | 2          | 58015414  | 241537572 | 97732      | 0.1817       |
| TCGA-78-7150-01A | LUAD   | 60.27769758 | KEAP1 | 19         | 283868    | 10478746  | 3525       | -0.2611      |
| TCGA-78-7150-01A | LUAD   | 60.27769758 | KEAP1 | 19         | 10482366  | 10499560  | 9          | -0.9901      |
| TCGA-78-7150-01A | LUAD   | 60.27769758 | KEAP1 | 19         | 10507986  | 10954492  | 192        | -0.2752      |
| TCGA-78-7150-01A | LUAD   | 60.27769758 | NRF2  | 2          | 176949139 | 178412366 | 880        | 0.4401       |
| TCGA-NC-A5HO-01A | LUSC   | 15.18788928 | KEAP1 | 19         | 283868    | 58370362  | 23874      | 0.1169       |
| TCGA-NC-A5HO-01A | LUSC   | 15.18788928 | NRF2  | 2          | 173664309 | 179098548 | 3254       | 0.513        |
| TCGA-85-6798-01A | LUSC   | 245.4831287 | KEAP1 | 19         | 283868    | 23868903  | 9058       | 0.1688       |
| TCGA-85-6798-01A | LUSC   | 245.4831287 | NRF2  | 2          | 176732546 | 181187955 | 2792       | 0.5147       |
| TCGA-94-A5I4-01A | LUSC   | 43.43623181 | KEAP1 | 19         | 283868    | 21158018  | 7718       | -0.0694      |
| TCGA-94-A5I4-01A | LUSC   | 43.43623181 | NRF2  | 2          | 141308625 | 193911165 | 29479      | 0.5001       |
| TCGA-22-5485-01A | LUSC   | 516.1184957 | KEAP1 | 19         | 8449396   | 10509520  | 1029       | -0.0355      |
| TCGA-22-5485-01A | LUSC   | 516.1184957 | KEAP1 | 19         | 10510389  | 10510532  | 2          | -1.7925      |
| TCGA-22-5485-01A | LUSC   | 516.1184957 | KEAP1 | 19         | 10513029  | 11053013  | 247        | -0.0242      |
| TCGA-22-5485-01A | LUSC   | 516.1184957 | NRF2  | 2          | 175810466 | 178066361 | 1455       | 0.2018       |
| TCGA-NK-A7XE-01A | LUSC   | 46.01605056 | KEAP1 | 19         | 283868    | 23872082  | 9053       | -0.1876      |
| TCGA-NK-A7XE-01A | LUSC   | 46.01605056 | NRF2  | 2          | 167202409 | 186514311 | 11336      | 0.5572       |
| TCGA-LG-A6GG-01A | LIHC   | 22.43418151 | KEAP1 | 19         | 8803416   | 11039529  | 1098       | -0.8352      |
| TCGA-LG-A6GG-01A | LIHC   | 22.43418151 | NRF2  | 2          | 170178516 | 230889076 | 34897      | 0.236        |
| TCGA-CR-7374-01A | HNSC   | 25.0589726  | KEAP1 | 19         | 6407180   | 27984524  | 7468       | 0.155        |
| TCGA-CR-7374-01A | HNSC   | 25.0589726  | NRF2  | 2          | 175632645 | 178437674 | 1792       | 0.5509       |
| TCGA-DD-AACZ-01A | LIHC   | 47.35058323 | KEAP1 | 19         | 283868    | 10478746  | 3519       | -0.263       |
| TCGA-DD-AACZ-01A | LIHC   | 47.35058323 | KEAP1 | 19         | 10482366  | 10485210  | 4          | -1.6509      |
| TCGA-DD-AACZ-01A | LIHC   | 47.35058323 | KEAP1 | 19         | 10488048  | 23200921  | 5116       | -0.2729      |
| TCGA-DD-AACZ-01A | LIHC   | 47.35058323 | NRF2  | 2          | 166146564 | 180617079 | 9164       | 0.106        |
